# Supplementary material for: The Major RNA-Binding Protein ProQ Impacts Virulence Gene Expression in Salmonella enterica Serovar Typhimurium
Source: PubMed Central journal article supplement (PMC6315103; doi:10.1128/mbio.02504-18), 2019-01-02

# Supplementary Figure S4

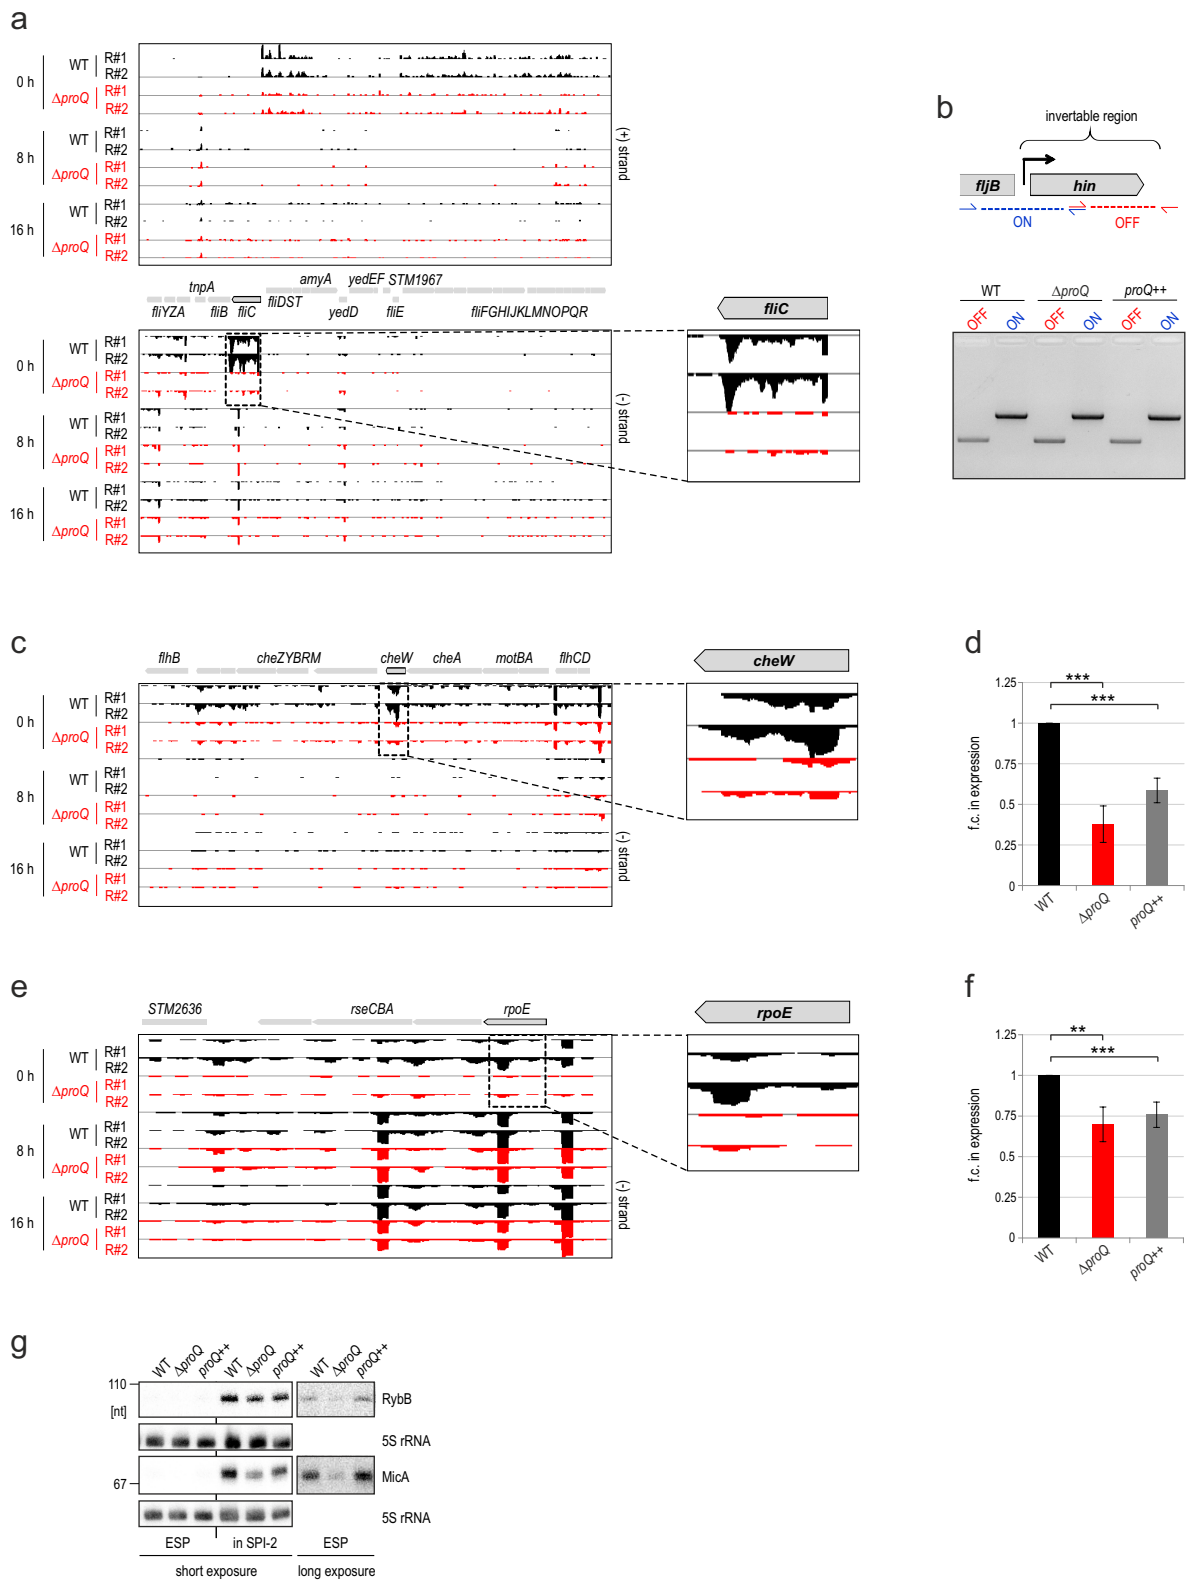

Supplement: mbo006184234sf4.pdf [file mbo006184234sf4.pdf]
